# Supplementary material for: Single-gene prognostic signatures for advanced stage serous ovarian cancer based on 1257 patient samples
Source: Royal Society of Chemistry journal article supplement (doi:10.1039/c7mo00119c), 2018-02-28
Supplement: c7mo00119c2.pdf [file c7mo00119c2.pdf]

**Single-gene prognostic signatures for advanced stage serous ovarian cancer based on 1257 patient samples**

Fan Zhang<sup>1,†</sup>, Kai Yang<sup>1,†</sup>, Kui Deng<sup>1</sup>, Yuanyuan Zhang<sup>1</sup>, Weiwei Zhao<sup>1</sup>, Huan Xu<sup>1</sup>,  
Zhiwei Rong<sup>1</sup>, Kang Li<sup>1,\*</sup>

<sup>1</sup>Department of Biostatistics, Public Health School, Harbin Medical University,  
Harbin, 150086, P.R. China

\*Corresponding author: Kang Li Email: [likang@ems.hrbmu.edu.cn](mailto:likang@ems.hrbmu.edu.cn). Tel: 86-451-87502939. Fax: 86-451-87502831.

† These authors contributed equally to this work.

### **The process of principal component regression**

Firstly, we conducted principal component analysis for 341 genes in EB dataset.

Secondly, the scores of principal components in each sample were calculated by multiplying loadings and gene expression values.

Thirdly, we conducted cox regression for different number of principal components. The third principal component was not statistically significant. So, we selected first 2 components.

### **R code for principal component regression in this study**

```
data=read.csv("G:\\dataForPCR.csv")
data2=data[,4:ncol(data)]
#principle component analysis
pca<-prcomp(data2)
#The loadings of 341 genes in the first 2 components
loadings=pca$rotation[,1:2]
#cox regression for first 2 components
pc12=data.frame(pca$x[,1:2],status=data[,2],time=data[,3])
library(survival)
coxph(Surv(time, status)~PC1+PC2,data=pc12)
```

**Supplementary Table S1.** The detailed information of genes associated with OS in this study.

| No.                            | Gene    | P        | FDR      | C     | HR(CI)          |
|--------------------------------|---------|----------|----------|-------|-----------------|
| Positively OS-associated genes |         |          |          |       |                 |
| 1                              | GMPR    | 1.27E-07 | 5.30E-04 | -0.18 | 0.84(0.78-0.89) |
| 2                              | ALDH5A1 | 5.71E-07 | 1.23E-03 | -0.22 | 0.8(0.74-0.88)  |
| 3                              | PCK2    | 2.75E-06 | 3.27E-03 | -0.29 | 0.75(0.66-0.84) |
| 4                              | GJB1    | 4.04E-06 | 3.27E-03 | -0.26 | 0.77(0.69-0.86) |
| 5                              | DHRS4   | 4.38E-06 | 3.27E-03 | -0.33 | 0.72(0.62-0.83) |
| 6                              | SNRPA1  | 9.36E-06 | 4.24E-03 | -0.25 | 0.78(0.7-0.87)  |
| 7                              | PRIM2   | 1.06E-05 | 4.24E-03 | -0.29 | 0.75(0.65-0.85) |
| 8                              | EMC9    | 1.80E-05 | 4.47E-03 | -0.31 | 0.73(0.64-0.85) |
| 9                              | STOML2  | 2.14E-05 | 4.47E-03 | -0.25 | 0.78(0.69-0.87) |
| 10                             | CAAP1   | 2.16E-05 | 6.38E-03 | -0.23 | 0.79(0.71-0.88) |
| 11                             | MCM5    | 2.57E-05 | 8.43E-03 | -0.20 | 0.82(0.75-0.9)  |
| 12                             | PSME2P2 | 2.69E-05 | 8.43E-03 | -0.26 | 0.77(0.69-0.87) |
| 13                             | IL6R    | 2.87E-05 | 8.43E-03 | -0.16 | 0.85(0.79-0.92) |
| 14                             | PLAA    | 3.52E-05 | 1.78E-02 | -0.29 | 0.75(0.66-0.86) |
| 15                             | CD38    | 3.76E-05 | 1.78E-02 | -0.21 | 0.81(0.73-0.89) |
| 16                             | SLC37A4 | 4.54E-05 | 1.78E-02 | -0.29 | 0.75(0.65-0.86) |
| 17                             | CXCL11  | 5.08E-05 | 1.78E-02 | -0.10 | 0.9(0.86-0.95)  |
| 18                             | POLD3   | 5.49E-05 | 1.78E-02 | -0.29 | 0.75(0.65-0.86) |
| 19                             | FOXJ1   | 5.94E-05 | 1.78E-02 | -0.18 | 0.83(0.76-0.91) |
| 20                             | OXLD1   | 6.78E-05 | 1.78E-02 | -0.25 | 0.78(0.68-0.88) |
| 21                             | TRIM27  | 8.83E-05 | 2.15E-02 | -0.25 | 0.78(0.69-0.88) |
| 22                             | CCL13   | 9.18E-05 | 2.15E-02 | -0.32 | 0.72(0.62-0.85) |
| 23                             | ZNF165  | 1.06E-04 | 2.15E-02 | -0.20 | 0.82(0.74-0.91) |
| 24                             | CYB561  | 1.11E-04 | 2.15E-02 | -0.26 | 0.77(0.68-0.88) |
| 25                             | CYBA    | 1.15E-04 | 2.15E-02 | -0.19 | 0.83(0.76-0.91) |
| 26                             | CNOT4   | 1.16E-04 | 2.15E-02 | -0.28 | 0.75(0.65-0.87) |
| 27                             | TESK1   | 1.22E-04 | 2.15E-02 | -0.31 | 0.73(0.63-0.86) |
| 28                             | ACOT13  | 1.25E-04 | 2.15E-02 | -0.22 | 0.8(0.72-0.9)   |
| 29                             | SDF2L1  | 1.35E-04 | 2.15E-02 | -0.20 | 0.82(0.74-0.91) |
| 30                             | WDR77   | 1.36E-04 | 2.15E-02 | -0.26 | 0.77(0.67-0.88) |
| 31                             | SLC27A2 | 1.39E-04 | 2.15E-02 | -0.30 | 0.74(0.63-0.86) |
| 32                             | GSTZ1   | 1.43E-04 | 2.15E-02 | -0.22 | 0.8(0.71-0.9)   |
| 33                             | FCHSD2  | 1.50E-04 | 2.15E-02 | -0.25 | 0.78(0.68-0.88) |
| 34                             | ST6GAL1 | 1.55E-04 | 2.15E-02 | -0.15 | 0.86(0.79-0.93) |
| 35                             | VCP     | 1.57E-04 | 2.36E-02 | -0.22 | 0.8(0.72-0.9)   |
| 36                             | RMI1    | 1.86E-04 | 2.36E-02 | -0.21 | 0.81(0.73-0.91) |
| 37                             | FEN1    | 1.86E-04 | 2.36E-02 | -0.20 | 0.82(0.74-0.91) |
| 38                             | PRPS2   | 1.87E-04 | 2.36E-02 | -0.18 | 0.84(0.76-0.92) |
| 39                             | NFX1    | 2.03E-04 | 2.36E-02 | -0.25 | 0.78(0.68-0.89) |
| 40                             | GALNT6  | 2.13E-04 | 2.36E-02 | -0.15 | 0.86(0.8-0.93)  |

---

|    |           |          |          |       |                 |
|----|-----------|----------|----------|-------|-----------------|
| 41 | RCL1      | 2.14E-04 | 2.36E-02 | -0.29 | 0.74(0.64-0.87) |
| 42 | GCNT1     | 2.15E-04 | 2.36E-02 | -0.26 | 0.77(0.67-0.89) |
| 43 | FN3KRP    | 2.16E-04 | 2.36E-02 | -0.28 | 0.76(0.66-0.88) |
| 44 | SLC5A1    | 2.36E-04 | 2.36E-02 | -0.16 | 0.86(0.79-0.93) |
| 45 | SPDEF     | 2.46E-04 | 2.36E-02 | -0.16 | 0.85(0.78-0.93) |
| 46 | TRIM26    | 2.50E-04 | 2.36E-02 | -0.29 | 0.75(0.64-0.88) |
| 47 | CHAF1B    | 2.55E-04 | 2.36E-02 | -0.28 | 0.76(0.65-0.88) |
| 48 | CASP8AP2  | 2.57E-04 | 2.36E-02 | -0.22 | 0.81(0.72-0.9)  |
| 49 | PIR       | 2.58E-04 | 2.36E-02 | -0.14 | 0.87(0.81-0.94) |
| 50 | GALNT12   | 2.64E-04 | 3.17E-02 | -0.16 | 0.86(0.79-0.93) |
| 51 | POLA2     | 2.88E-04 | 3.17E-02 | -0.29 | 0.75(0.64-0.88) |
| 52 | GZMB      | 2.91E-04 | 3.17E-02 | -0.15 | 0.86(0.79-0.93) |
| 53 | MCM3      | 3.03E-04 | 3.17E-02 | -0.19 | 0.82(0.74-0.92) |
| 54 | STXBP6    | 3.08E-04 | 3.17E-02 | -0.10 | 0.91(0.86-0.96) |
| 55 | MCAT      | 3.13E-04 | 3.17E-02 | -0.28 | 0.76(0.65-0.88) |
| 56 | C9orf116  | 3.20E-04 | 3.17E-02 | -0.22 | 0.8(0.71-0.91)  |
| 57 | SYK       | 3.21E-04 | 3.17E-02 | -0.17 | 0.85(0.77-0.93) |
| 58 | BCAP31    | 3.35E-04 | 3.17E-02 | -0.22 | 0.8(0.71-0.9)   |
| 59 | COX7A2P2  | 3.40E-04 | 3.17E-02 | -0.24 | 0.78(0.69-0.9)  |
| 60 | BRCC3     | 3.40E-04 | 3.17E-02 | -0.22 | 0.81(0.72-0.91) |
| 61 | SDR39U1   | 3.45E-04 | 3.17E-02 | -0.26 | 0.77(0.67-0.89) |
| 62 | ZNHIT2    | 3.56E-04 | 3.17E-02 | -0.31 | 0.73(0.62-0.87) |
| 63 | LRRK1     | 3.68E-04 | 3.17E-02 | -0.27 | 0.76(0.66-0.89) |
| 64 | WDR3      | 3.89E-04 | 3.55E-02 | -0.21 | 0.81(0.72-0.91) |
| 65 | SIRT5     | 4.00E-04 | 3.55E-02 | -0.20 | 0.82(0.73-0.91) |
| 66 | COA4      | 4.00E-04 | 3.55E-02 | -0.22 | 0.8(0.71-0.91)  |
| 67 | EFTUD1    | 4.12E-04 | 3.55E-02 | -0.26 | 0.77(0.66-0.89) |
| 68 | FAM86B2   | 4.26E-04 | 3.55E-02 | -0.40 | 0.67(0.53-0.84) |
| 69 | WDR45B    | 4.44E-04 | 3.55E-02 | -0.21 | 0.81(0.72-0.91) |
| 70 | CIB1      | 4.47E-04 | 3.55E-02 | -0.20 | 0.82(0.74-0.92) |
| 71 | NT5C      | 4.55E-04 | 4.05E-02 | -0.34 | 0.71(0.59-0.86) |
| 72 | ENDOG     | 4.60E-04 | 4.05E-02 | -0.20 | 0.82(0.73-0.91) |
| 73 | UBD       | 4.96E-04 | 4.05E-02 | -0.07 | 0.93(0.89-0.97) |
| 74 | POLG      | 4.98E-04 | 4.05E-02 | -0.28 | 0.76(0.65-0.89) |
| 75 | FOCAD     | 5.05E-04 | 4.05E-02 | -0.21 | 0.81(0.73-0.91) |
| 76 | AADAC     | 5.22E-04 | 4.05E-02 | -0.13 | 0.88(0.81-0.94) |
| 77 | SLC25A1   | 5.42E-04 | 4.05E-02 | -0.20 | 0.82(0.73-0.92) |
| 78 | WARS      | 5.51E-04 | 4.05E-02 | -0.16 | 0.85(0.78-0.93) |
| 79 | SYNGR2    | 5.59E-04 | 4.05E-02 | -0.18 | 0.83(0.75-0.92) |
| 80 | CREB3     | 5.79E-04 | 4.05E-02 | -0.26 | 0.77(0.67-0.9)  |
| 81 | GPRC5C    | 6.26E-04 | 4.05E-02 | -0.15 | 0.86(0.79-0.94) |
| 82 | DNAJA1    | 6.28E-04 | 4.05E-02 | -0.19 | 0.82(0.74-0.92) |
| 83 | LINC00338 | 6.40E-04 | 4.05E-02 | -0.23 | 0.8(0.7-0.91)   |
| 84 | MAK       | 6.67E-04 | 4.05E-02 | -0.19 | 0.83(0.74-0.92) |

---

|     |          |          |          |       |                 |
|-----|----------|----------|----------|-------|-----------------|
| 85  | TBCC     | 7.10E-04 | 4.05E-02 | -0.25 | 0.78(0.68-0.9)  |
| 86  | TAP2     | 7.29E-04 | 4.05E-02 | -0.15 | 0.86(0.79-0.94) |
| 87  | KRT18P38 | 7.59E-04 | 4.05E-02 | -0.53 | 0.59(0.43-0.8)  |
| 88  | EFHC2    | 7.69E-04 | 4.05E-02 | -0.14 | 0.87(0.8-0.94)  |
| 89  | GMPR2    | 7.70E-04 | 4.05E-02 | -0.21 | 0.81(0.72-0.92) |
| 90  | LRIF1    | 7.75E-04 | 4.37E-02 | -0.21 | 0.81(0.72-0.92) |
| 91  | TIPIN    | 7.84E-04 | 4.37E-02 | -0.22 | 0.8(0.71-0.91)  |
| 92  | MRPS11   | 7.89E-04 | 4.37E-02 | -0.24 | 0.79(0.69-0.91) |
| 93  | SLC7A11  | 8.18E-04 | 4.37E-02 | -0.12 | 0.89(0.83-0.95) |
| 94  | SENP6    | 8.26E-04 | 4.37E-02 | -0.20 | 0.82(0.73-0.92) |
| 95  | GCH1     | 8.33E-04 | 4.37E-02 | -0.14 | 0.87(0.81-0.95) |
| 96  | SURF2    | 8.37E-04 | 4.37E-02 | -0.30 | 0.74(0.62-0.88) |
| 97  | C6orf165 | 8.50E-04 | 4.37E-02 | -0.20 | 0.82(0.72-0.92) |
| 98  | FAH      | 8.93E-04 | 4.37E-02 | -0.14 | 0.87(0.8-0.94)  |
| 99  | TDP2     | 8.99E-04 | 4.37E-02 | -0.18 | 0.83(0.75-0.93) |
| 100 | MAGEF1   | 9.05E-04 | 4.37E-02 | -0.21 | 0.81(0.72-0.92) |
| 101 | ZNF440   | 9.06E-04 | 4.37E-02 | -0.26 | 0.77(0.66-0.9)  |
| 102 | KIAA0020 | 9.19E-04 | 4.37E-02 | -0.21 | 0.81(0.72-0.92) |
| 103 | TAP1     | 9.19E-04 | 4.37E-02 | -0.11 | 0.9(0.84-0.96)  |
| 104 | SDHAP3   | 9.20E-04 | 4.37E-02 | -0.24 | 0.79(0.69-0.91) |
| 105 | FRYL     | 9.23E-04 | 4.37E-02 | -0.23 | 0.79(0.69-0.91) |
| 106 | LRIG1    | 9.29E-04 | 4.37E-02 | -0.11 | 0.89(0.84-0.96) |
| 107 | THOP1    | 9.37E-04 | 4.37E-02 | -0.34 | 0.71(0.58-0.87) |
| 108 | HLA-DOB  | 9.52E-04 | 4.37E-02 | -0.19 | 0.83(0.74-0.93) |
| 109 | NAT10    | 9.60E-04 | 4.37E-02 | -0.23 | 0.79(0.69-0.91) |
| 110 | LPAR2    | 9.60E-04 | 4.37E-02 | -0.24 | 0.79(0.68-0.91) |

Negatively OS-associated genes

|    |                |          |          |      |                 |
|----|----------------|----------|----------|------|-----------------|
| 1  | HSPB7          | 1.08E-07 | 5.30E-04 | 0.54 | 1.71(1.41-2.09) |
| 2  | ASAP3          | 1.68E-07 | 8.69E-04 | 0.35 | 1.41(1.24-1.61) |
| 3  | AXL            | 2.60E-07 | 1.23E-03 | 0.26 | 1.3(1.17-1.43)  |
| 4  | CILP           | 4.44E-07 | 1.23E-03 | 0.15 | 1.16(1.1-1.23)  |
| 5  | MFAP4          | 6.52E-07 | 3.27E-03 | 0.17 | 1.19(1.11-1.27) |
| 6  | LRP1           | 1.07E-06 | 3.27E-03 | 0.35 | 1.42(1.23-1.63) |
| 7  | TMEM256-PLSCR3 | 1.60E-06 | 3.27E-03 | 0.35 | 1.42(1.23-1.63) |
| 8  | LUZP1          | 1.81E-06 | 3.27E-03 | 0.41 | 1.5(1.27-1.77)  |
| 9  | RAB11FIP5      | 2.93E-06 | 3.27E-03 | 0.40 | 1.5(1.26-1.77)  |
| 10 | ZFHX4          | 3.22E-06 | 3.27E-03 | 0.27 | 1.31(1.17-1.48) |
| 11 | EHD2           | 3.61E-06 | 3.27E-03 | 0.31 | 1.37(1.2-1.56)  |
| 12 | HP1BP3         | 4.36E-06 | 3.27E-03 | 0.27 | 1.31(1.17-1.47) |
| 13 | LRRN3          | 4.46E-06 | 4.24E-03 | 0.33 | 1.39(1.21-1.6)  |
| 14 | TMEM204        | 6.38E-06 | 4.24E-03 | 0.31 | 1.36(1.19-1.55) |
| 15 | MAL            | 6.41E-06 | 4.24E-03 | 0.09 | 1.09(1.05-1.13) |
| 16 | CRYAB          | 6.97E-06 | 4.24E-03 | 0.12 | 1.13(1.07-1.19) |
| 17 | SVIL           | 7.49E-06 | 4.24E-03 | 0.20 | 1.22(1.12-1.33) |

|    |             |          |          |      |                 |
|----|-------------|----------|----------|------|-----------------|
| 18 | COL16A1     | 7.50E-06 | 4.24E-03 | 0.18 | 1.19(1.1-1.29)  |
| 19 | NUAK1       | 7.67E-06 | 4.24E-03 | 0.15 | 1.16(1.09-1.23) |
| 20 | JAM2        | 8.50E-06 | 4.24E-03 | 0.20 | 1.22(1.12-1.33) |
| 21 | GPR124      | 8.82E-06 | 4.24E-03 | 0.27 | 1.31(1.16-1.47) |
| 22 | ARNT        | 9.44E-06 | 4.24E-03 | 0.33 | 1.39(1.2-1.62)  |
| 23 | GALNT10     | 9.62E-06 | 4.24E-03 | 0.23 | 1.26(1.14-1.39) |
| 24 | MINOS1-NBL1 | 1.02E-05 | 4.24E-03 | 0.17 | 1.19(1.1-1.29)  |
| 25 | AKAP12      | 1.11E-05 | 4.24E-03 | 0.13 | 1.14(1.08-1.21) |
| 26 | PDGFD       | 1.16E-05 | 4.24E-03 | 0.15 | 1.16(1.08-1.24) |
| 27 | LRRC17      | 1.16E-05 | 4.47E-03 | 0.13 | 1.14(1.07-1.2)  |
| 28 | PDGFRB      | 1.29E-05 | 4.47E-03 | 0.25 | 1.28(1.14-1.43) |
| 29 | GLT8D2      | 1.30E-05 | 4.47E-03 | 0.18 | 1.2(1.1-1.3)    |
| 30 | PTPRD       | 1.38E-05 | 4.47E-03 | 0.20 | 1.22(1.12-1.34) |
| 31 | ZEB1        | 1.54E-05 | 4.47E-03 | 0.16 | 1.17(1.09-1.26) |
| 32 | ID3         | 1.56E-05 | 4.47E-03 | 0.17 | 1.19(1.1-1.29)  |
| 33 | PDPN        | 1.71E-05 | 4.47E-03 | 0.16 | 1.18(1.09-1.27) |
| 34 | VAT1        | 1.77E-05 | 4.47E-03 | 0.32 | 1.38(1.19-1.59) |
| 35 | SV2A        | 1.80E-05 | 4.47E-03 | 0.23 | 1.26(1.13-1.4)  |
| 36 | C1QTNF3     | 1.81E-05 | 4.47E-03 | 0.15 | 1.16(1.09-1.24) |
| 37 | MXRA8       | 1.86E-05 | 4.47E-03 | 0.16 | 1.18(1.09-1.27) |
| 38 | ZCCHC24     | 1.93E-05 | 4.47E-03 | 0.21 | 1.23(1.12-1.36) |
| 39 | DCHS1       | 1.98E-05 | 4.47E-03 | 0.18 | 1.2(1.1-1.31)   |
| 40 | TUBB6       | 2.02E-05 | 4.47E-03 | 0.17 | 1.19(1.1-1.28)  |
| 41 | COPZ2       | 2.05E-05 | 4.47E-03 | 0.21 | 1.24(1.12-1.37) |
| 42 | TIMP3       | 2.05E-05 | 4.47E-03 | 0.12 | 1.13(1.07-1.19) |
| 43 | FZD1        | 2.08E-05 | 4.47E-03 | 0.20 | 1.22(1.11-1.34) |
| 44 | GFPT2       | 2.09E-05 | 4.47E-03 | 0.22 | 1.24(1.12-1.37) |
| 45 | SYDE1       | 2.14E-05 | 4.47E-03 | 0.37 | 1.44(1.22-1.71) |
| 46 | HSD17B6     | 2.24E-05 | 6.38E-03 | 0.22 | 1.25(1.13-1.39) |
| 47 | SH3PXD2A    | 2.29E-05 | 8.43E-03 | 0.30 | 1.35(1.18-1.56) |
| 48 | MPRIP       | 2.66E-05 | 8.43E-03 | 0.32 | 1.37(1.18-1.59) |
| 49 | IGF2        | 2.75E-05 | 8.43E-03 | 0.06 | 1.06(1.03-1.09) |
| 50 | RHOBTB3     | 2.92E-05 | 8.43E-03 | 0.14 | 1.15(1.08-1.22) |
| 51 | ECM2        | 2.92E-05 | 1.24E-02 | 0.15 | 1.16(1.08-1.24) |
| 52 | MAGEL2      | 3.05E-05 | 1.78E-02 | 0.31 | 1.36(1.18-1.57) |
| 53 | HSPB6       | 3.42E-05 | 1.78E-02 | 0.23 | 1.26(1.13-1.41) |
| 54 | ENOX1       | 3.93E-05 | 1.78E-02 | 0.32 | 1.38(1.18-1.61) |
| 55 | CD302       | 4.17E-05 | 1.78E-02 | 0.17 | 1.18(1.09-1.28) |
| 56 | N4BP2L2     | 5.02E-05 | 1.78E-02 | 0.24 | 1.27(1.13-1.42) |
| 57 | FXYD5       | 5.73E-05 | 1.78E-02 | 0.18 | 1.2(1.1-1.31)   |
| 58 | FOXN3       | 6.04E-05 | 1.78E-02 | 0.25 | 1.28(1.14-1.45) |
| 59 | COL5A1      | 6.06E-05 | 1.78E-02 | 0.10 | 1.1(1.05-1.16)  |
| 60 | KIF26B      | 6.18E-05 | 1.78E-02 | 0.20 | 1.22(1.11-1.35) |
| 61 | ITSN1       | 6.36E-05 | 1.78E-02 | 0.32 | 1.37(1.18-1.6)  |

---

|     |          |          |          |      |                 |
|-----|----------|----------|----------|------|-----------------|
| 62  | SORBS1   | 6.36E-05 | 1.78E-02 | 0.21 | 1.24(1.11-1.37) |
| 63  | FGF1     | 6.46E-05 | 1.78E-02 | 0.29 | 1.33(1.16-1.54) |
| 64  | SLIT3    | 6.49E-05 | 1.78E-02 | 0.21 | 1.23(1.11-1.36) |
| 65  | AP3S1    | 6.81E-05 | 2.15E-02 | 0.30 | 1.35(1.16-1.56) |
| 66  | HIGD1B   | 7.58E-05 | 2.15E-02 | 0.47 | 1.6(1.27-2.01)  |
| 67  | APOD     | 7.86E-05 | 2.15E-02 | 0.17 | 1.18(1.09-1.28) |
| 68  | TMEM158  | 8.08E-05 | 2.15E-02 | 0.11 | 1.12(1.06-1.18) |
| 69  | MUL1     | 8.31E-05 | 2.15E-02 | 0.44 | 1.55(1.25-1.93) |
| 70  | LEFTY2   | 8.38E-05 | 2.15E-02 | 0.23 | 1.26(1.12-1.41) |
| 71  | SACS     | 8.97E-05 | 2.15E-02 | 0.21 | 1.24(1.11-1.38) |
| 72  | FSTL3    | 9.02E-05 | 2.15E-02 | 0.36 | 1.44(1.2-1.72)  |
| 73  | PPP1R13L | 1.01E-04 | 2.15E-02 | 0.23 | 1.26(1.12-1.41) |
| 74  | WBP1L    | 1.10E-04 | 2.15E-02 | 0.25 | 1.28(1.13-1.45) |
| 75  | ANGPTL2  | 1.12E-04 | 2.15E-02 | 0.19 | 1.21(1.1-1.33)  |
| 76  | CLIP3    | 1.13E-04 | 2.15E-02 | 0.18 | 1.2(1.09-1.31)  |
| 77  | CYTH3    | 1.14E-04 | 2.15E-02 | 0.36 | 1.44(1.19-1.73) |
| 78  | ESD      | 1.20E-04 | 2.15E-02 | 0.25 | 1.28(1.13-1.45) |
| 79  | PLXDC1   | 1.21E-04 | 2.15E-02 | 0.20 | 1.22(1.1-1.36)  |
| 80  | CYBRD1   | 1.27E-04 | 2.15E-02 | 0.13 | 1.14(1.07-1.22) |
| 81  | LMCD1    | 1.38E-04 | 2.15E-02 | 0.18 | 1.2(1.09-1.32)  |
| 82  | PAK4     | 1.40E-04 | 2.15E-02 | 0.26 | 1.29(1.13-1.47) |
| 83  | SEMA4F   | 1.42E-04 | 2.15E-02 | 0.34 | 1.41(1.18-1.68) |
| 84  | PCOLCE   | 1.43E-04 | 2.15E-02 | 0.14 | 1.15(1.07-1.24) |
| 85  | SVEP1    | 1.43E-04 | 2.15E-02 | 0.19 | 1.21(1.1-1.33)  |
| 86  | ZFP36    | 1.46E-04 | 2.15E-02 | 0.14 | 1.15(1.07-1.24) |
| 87  | ABCD2    | 1.48E-04 | 2.15E-02 | 1.06 | 2.89(1.67-4.99) |
| 88  | PPP3CA   | 1.55E-04 | 2.15E-02 | 0.21 | 1.23(1.11-1.37) |
| 89  | MAN2A1   | 1.57E-04 | 2.15E-02 | 0.20 | 1.22(1.1-1.34)  |
| 90  | COMP     | 1.70E-04 | 2.36E-02 | 0.08 | 1.09(1.04-1.13) |
| 91  | RHOT1    | 1.74E-04 | 2.36E-02 | 0.28 | 1.32(1.14-1.53) |
| 92  | ARHGAP19 | 1.74E-04 | 2.36E-02 | 0.28 | 1.33(1.14-1.53) |
| 93  | FBN1     | 1.80E-04 | 2.36E-02 | 0.10 | 1.11(1.05-1.17) |
| 94  | PSMC4    | 1.82E-04 | 2.36E-02 | 0.20 | 1.22(1.1-1.36)  |
| 95  | PRRX1    | 1.89E-04 | 2.36E-02 | 0.13 | 1.14(1.06-1.22) |
| 96  | LBP      | 1.98E-04 | 2.36E-02 | 0.36 | 1.43(1.18-1.72) |
| 97  | AEBP1    | 1.99E-04 | 2.36E-02 | 0.11 | 1.11(1.05-1.17) |
| 98  | XYLT1    | 2.00E-04 | 2.36E-02 | 0.20 | 1.22(1.1-1.35)  |
| 99  | PADI2    | 2.00E-04 | 2.36E-02 | 0.18 | 1.19(1.09-1.31) |
| 100 | SFXN3    | 2.01E-04 | 2.36E-02 | 0.25 | 1.28(1.13-1.46) |
| 101 | INHBA    | 2.07E-04 | 2.36E-02 | 0.08 | 1.09(1.04-1.14) |
| 102 | EYA4     | 2.17E-04 | 2.36E-02 | 0.12 | 1.13(1.06-1.2)  |
| 103 | PDGFRA   | 2.27E-04 | 2.36E-02 | 0.10 | 1.1(1.05-1.16)  |
| 104 | PTH1R    | 2.31E-04 | 2.36E-02 | 0.41 | 1.5(1.21-1.86)  |
| 105 | LTBP1    | 2.33E-04 | 2.36E-02 | 0.13 | 1.14(1.06-1.23) |

---

---

|     |          |          |          |      |                 |
|-----|----------|----------|----------|------|-----------------|
| 106 | PCDH9    | 2.36E-04 | 2.36E-02 | 0.19 | 1.21(1.09-1.34) |
| 107 | TUBB2A   | 2.40E-04 | 2.36E-02 | 0.12 | 1.13(1.06-1.2)  |
| 108 | PALLD    | 2.40E-04 | 2.36E-02 | 0.14 | 1.15(1.07-1.23) |
| 109 | AHDC1    | 2.40E-04 | 2.36E-02 | 0.19 | 1.21(1.09-1.34) |
| 110 | WASF2    | 2.41E-04 | 2.36E-02 | 0.22 | 1.25(1.11-1.41) |
| 111 | PPAP2A   | 2.41E-04 | 2.36E-02 | 0.20 | 1.22(1.1-1.36)  |
| 112 | FAP      | 2.50E-04 | 2.36E-02 | 0.10 | 1.1(1.05-1.16)  |
| 113 | APH1B    | 2.51E-04 | 2.36E-02 | 0.25 | 1.29(1.12-1.47) |
| 114 | ZBTB40   | 2.53E-04 | 2.36E-02 | 0.36 | 1.44(1.18-1.74) |
| 115 | AKR7A2   | 2.59E-04 | 2.36E-02 | 0.23 | 1.26(1.11-1.43) |
| 116 | STK39    | 2.59E-04 | 3.17E-02 | 0.18 | 1.19(1.09-1.31) |
| 117 | ITGA5    | 2.71E-04 | 3.17E-02 | 0.22 | 1.25(1.11-1.41) |
| 118 | NET1     | 2.72E-04 | 3.17E-02 | 0.16 | 1.17(1.07-1.27) |
| 119 | TRIL     | 2.80E-04 | 3.17E-02 | 0.18 | 1.2(1.09-1.32)  |
| 120 | RBMS1P1  | 2.89E-04 | 3.17E-02 | 0.24 | 1.27(1.11-1.44) |
| 121 | SNAI2    | 2.96E-04 | 3.17E-02 | 0.11 | 1.11(1.05-1.18) |
| 122 | RCN3     | 3.05E-04 | 3.17E-02 | 0.17 | 1.19(1.08-1.31) |
| 123 | GUCY1A2  | 3.07E-04 | 3.17E-02 | 0.15 | 1.16(1.07-1.26) |
| 124 | PER1     | 3.10E-04 | 3.17E-02 | 0.37 | 1.44(1.18-1.76) |
| 125 | HTRA1    | 3.26E-04 | 3.17E-02 | 0.14 | 1.15(1.06-1.23) |
| 126 | IGFBP4   | 3.26E-04 | 3.17E-02 | 0.13 | 1.14(1.06-1.23) |
| 127 | CXCL14   | 3.40E-04 | 3.17E-02 | 0.08 | 1.08(1.04-1.13) |
| 128 | LYPD3    | 3.40E-04 | 3.17E-02 | 0.22 | 1.24(1.1-1.4)   |
| 129 | FBXO17   | 3.48E-04 | 3.17E-02 | 0.15 | 1.16(1.07-1.26) |
| 130 | LHFP     | 3.54E-04 | 3.17E-02 | 0.13 | 1.14(1.06-1.22) |
| 131 | LRRC15   | 3.61E-04 | 3.17E-02 | 0.10 | 1.1(1.04-1.16)  |
| 132 | MPZ      | 3.63E-04 | 3.17E-02 | 0.32 | 1.38(1.16-1.64) |
| 133 | DACT1    | 3.65E-04 | 3.17E-02 | 0.15 | 1.16(1.07-1.27) |
| 134 | KIAA1462 | 3.65E-04 | 3.17E-02 | 0.19 | 1.2(1.09-1.33)  |
| 135 | OMD      | 3.70E-04 | 3.55E-02 | 0.16 | 1.17(1.07-1.28) |
| 136 | PDE2A    | 3.92E-04 | 3.55E-02 | 0.33 | 1.4(1.16-1.68)  |
| 137 | RAI14    | 4.00E-04 | 3.55E-02 | 0.16 | 1.17(1.07-1.27) |
| 138 | RECK     | 4.01E-04 | 3.55E-02 | 0.18 | 1.2(1.08-1.32)  |
| 139 | GNB1     | 4.14E-04 | 3.55E-02 | 0.25 | 1.28(1.12-1.47) |
| 140 | TNFAIP6  | 4.14E-04 | 3.55E-02 | 0.12 | 1.13(1.06-1.21) |
| 141 | COL8A1   | 4.16E-04 | 3.55E-02 | 0.12 | 1.13(1.05-1.2)  |
| 142 | RGS16    | 4.23E-04 | 3.55E-02 | 0.15 | 1.17(1.07-1.27) |
| 143 | RIN2     | 4.26E-04 | 3.55E-02 | 0.21 | 1.24(1.1-1.39)  |
| 144 | ACTR1A   | 4.26E-04 | 3.55E-02 | 0.25 | 1.28(1.12-1.48) |
| 145 | FMO2     | 4.32E-04 | 3.55E-02 | 0.12 | 1.13(1.06-1.21) |
| 146 | NR2F1    | 4.35E-04 | 3.55E-02 | 0.12 | 1.13(1.06-1.21) |
| 147 | DKK2     | 4.40E-04 | 3.55E-02 | 0.16 | 1.18(1.08-1.29) |
| 148 | APBB2    | 4.45E-04 | 3.55E-02 | 0.19 | 1.21(1.09-1.35) |
| 149 | OLFML1   | 4.49E-04 | 4.05E-02 | 0.16 | 1.17(1.07-1.28) |

---



---

|     |          |          |          |      |                 |
|-----|----------|----------|----------|------|-----------------|
| 150 | SASH1    | 4.71E-04 | 4.05E-02 | 0.22 | 1.25(1.1-1.41)  |
| 151 | BLMH     | 4.80E-04 | 4.05E-02 | 0.22 | 1.25(1.1-1.41)  |
| 152 | CPEB1    | 5.01E-04 | 4.05E-02 | 0.26 | 1.29(1.12-1.5)  |
| 153 | RPS6KA2  | 5.04E-04 | 4.05E-02 | 0.24 | 1.28(1.11-1.47) |
| 154 | CALCOCO1 | 5.04E-04 | 4.05E-02 | 0.29 | 1.34(1.13-1.57) |
| 155 | PINK1    | 5.24E-04 | 4.05E-02 | 0.28 | 1.32(1.13-1.54) |
| 156 | ANTXR1   | 5.25E-04 | 4.05E-02 | 0.18 | 1.2(1.08-1.33)  |
| 157 | RPS23P8  | 5.37E-04 | 4.05E-02 | 0.31 | 1.37(1.14-1.63) |
| 158 | ADH1B    | 5.50E-04 | 4.05E-02 | 0.08 | 1.09(1.04-1.14) |
| 159 | GPC1     | 5.53E-04 | 4.05E-02 | 0.19 | 1.21(1.09-1.35) |
| 160 | PCBP3    | 5.56E-04 | 4.05E-02 | 0.44 | 1.56(1.21-2.01) |
| 161 | TMEM45A  | 5.57E-04 | 4.05E-02 | 0.11 | 1.12(1.05-1.19) |
| 162 | DCN      | 5.65E-04 | 4.05E-02 | 0.10 | 1.1(1.04-1.16)  |
| 163 | PPP1R3C  | 5.69E-04 | 4.05E-02 | 0.14 | 1.15(1.06-1.24) |
| 164 | RARRES2  | 5.73E-04 | 4.05E-02 | 0.12 | 1.12(1.05-1.2)  |
| 165 | PKD2     | 5.77E-04 | 4.05E-02 | 0.20 | 1.22(1.09-1.36) |
| 166 | MFAP5    | 5.85E-04 | 4.05E-02 | 0.07 | 1.08(1.03-1.12) |
| 167 | PLOD3    | 5.85E-04 | 4.05E-02 | 0.30 | 1.34(1.14-1.59) |
| 168 | SPARC    | 5.87E-04 | 4.05E-02 | 0.13 | 1.14(1.06-1.23) |
| 169 | RHOB     | 5.92E-04 | 4.05E-02 | 0.13 | 1.14(1.06-1.22) |
| 170 | OSR2     | 5.95E-04 | 4.05E-02 | 0.11 | 1.11(1.05-1.19) |
| 171 | SUPT5H   | 5.98E-04 | 4.05E-02 | 0.22 | 1.25(1.1-1.41)  |
| 172 | PDP1     | 6.01E-04 | 4.05E-02 | 0.16 | 1.17(1.07-1.28) |
| 173 | TPT1     | 6.23E-04 | 4.05E-02 | 0.39 | 1.48(1.18-1.85) |
| 174 | SNORA31  | 6.32E-04 | 4.05E-02 | 0.40 | 1.49(1.19-1.88) |
| 175 | PDLIM2   | 6.37E-04 | 4.05E-02 | 0.18 | 1.19(1.08-1.32) |
| 176 | MOXD1    | 6.39E-04 | 4.05E-02 | 0.14 | 1.15(1.06-1.25) |
| 177 | THBS2    | 6.46E-04 | 4.05E-02 | 0.07 | 1.08(1.03-1.12) |
| 178 | APPL2    | 6.53E-04 | 4.05E-02 | 0.19 | 1.21(1.08-1.35) |
| 179 | ADRA2A   | 6.55E-04 | 4.05E-02 | 0.12 | 1.13(1.05-1.21) |
| 180 | LMOD1    | 6.56E-04 | 4.05E-02 | 0.18 | 1.19(1.08-1.32) |
| 181 | RPL21P75 | 6.57E-04 | 4.05E-02 | 0.27 | 1.31(1.12-1.53) |
| 182 | TGFB1I1  | 6.69E-04 | 4.05E-02 | 0.12 | 1.12(1.05-1.2)  |
| 183 | YWHAB    | 6.75E-04 | 4.05E-02 | 0.27 | 1.31(1.12-1.53) |
| 184 | GNAI1    | 6.80E-04 | 4.05E-02 | 0.16 | 1.17(1.07-1.28) |
| 185 | TMEM222  | 6.81E-04 | 4.05E-02 | 0.35 | 1.42(1.16-1.73) |
| 186 | SERTAD3  | 6.92E-04 | 4.05E-02 | 0.18 | 1.2(1.08-1.33)  |
| 187 | SNORA21  | 6.97E-04 | 4.05E-02 | 0.27 | 1.31(1.12-1.53) |
| 188 | PRKG1    | 6.98E-04 | 4.05E-02 | 0.25 | 1.28(1.11-1.48) |
| 189 | SRPX2    | 7.07E-04 | 4.05E-02 | 0.16 | 1.17(1.07-1.28) |
| 190 | UBL3     | 7.15E-04 | 4.05E-02 | 0.22 | 1.24(1.1-1.41)  |
| 191 | NDRG3    | 7.21E-04 | 4.05E-02 | 0.24 | 1.27(1.1-1.45)  |
| 192 | ZNF365   | 7.27E-04 | 4.05E-02 | 0.33 | 1.39(1.15-1.67) |
| 193 | CPQ      | 7.30E-04 | 4.05E-02 | 0.20 | 1.22(1.09-1.38) |

---

|     |                |          |          |      |                 |
|-----|----------------|----------|----------|------|-----------------|
| 194 | RNASEL         | 7.34E-04 | 4.05E-02 | 0.25 | 1.29(1.11-1.49) |
| 195 | PLEKHA1        | 7.45E-04 | 4.05E-02 | 0.21 | 1.24(1.09-1.4)  |
| 196 | HIPK1          | 7.46E-04 | 4.05E-02 | 0.14 | 1.15(1.06-1.24) |
| 197 | PTRF           | 7.51E-04 | 4.05E-02 | 0.15 | 1.17(1.07-1.28) |
| 198 | FLNC           | 7.53E-04 | 4.05E-02 | 0.22 | 1.25(1.1-1.42)  |
| 199 | PDLIM3         | 7.54E-04 | 4.05E-02 | 0.11 | 1.12(1.05-1.2)  |
| 200 | ITPKC          | 7.54E-04 | 4.05E-02 | 0.22 | 1.25(1.1-1.42)  |
| 201 | HSPB2-C11orf52 | 7.55E-04 | 4.05E-02 | 0.17 | 1.19(1.08-1.31) |
| 202 | ASPN           | 7.56E-04 | 4.05E-02 | 0.08 | 1.08(1.03-1.13) |
| 203 | NPY            | 7.62E-04 | 4.05E-02 | 0.11 | 1.11(1.05-1.18) |
| 204 | KIAA0355       | 7.64E-04 | 4.05E-02 | 0.23 | 1.26(1.1-1.44)  |
| 205 | KPNA3          | 7.75E-04 | 4.05E-02 | 0.24 | 1.27(1.1-1.45)  |
| 206 | BCHE           | 7.88E-04 | 4.37E-02 | 0.12 | 1.13(1.05-1.21) |
| 207 | SUGCT          | 7.97E-04 | 4.37E-02 | 0.14 | 1.15(1.06-1.25) |
| 208 | PPEF1          | 8.15E-04 | 4.37E-02 | 0.30 | 1.35(1.13-1.61) |
| 209 | ZNF780B        | 8.28E-04 | 4.37E-02 | 0.29 | 1.34(1.13-1.58) |
| 210 | RPS16          | 8.42E-04 | 4.37E-02 | 0.32 | 1.38(1.14-1.67) |
| 211 | CRY2           | 8.52E-04 | 4.37E-02 | 0.38 | 1.47(1.17-1.83) |
| 212 | ERCC8          | 8.67E-04 | 4.37E-02 | 0.25 | 1.29(1.11-1.49) |
| 213 | MYL9           | 8.85E-04 | 4.37E-02 | 0.12 | 1.13(1.05-1.21) |
| 214 | COL10A1        | 8.88E-04 | 4.37E-02 | 0.08 | 1.09(1.03-1.14) |
| 215 | CLIC3          | 8.92E-04 | 4.37E-02 | 0.11 | 1.12(1.05-1.19) |
| 216 | PTPN1          | 9.00E-04 | 4.37E-02 | 0.30 | 1.35(1.13-1.61) |
| 217 | EMILIN1        | 9.11E-04 | 4.37E-02 | 0.16 | 1.18(1.07-1.3)  |
| 218 | COX7C          | 9.22E-04 | 4.37E-02 | 0.25 | 1.28(1.11-1.49) |
| 219 | TMEM47         | 9.28E-04 | 4.37E-02 | 0.09 | 1.1(1.04-1.16)  |
| 220 | FAM114A1       | 9.37E-04 | 4.37E-02 | 0.22 | 1.24(1.09-1.41) |
| 221 | EMCN           | 9.42E-04 | 4.37E-02 | 0.22 | 1.25(1.09-1.42) |
| 222 | EDNRA          | 9.42E-04 | 4.37E-02 | 0.12 | 1.13(1.05-1.21) |
| 223 | COL11A1        | 9.44E-04 | 4.37E-02 | 0.05 | 1.05(1.02-1.09) |
| 224 | ACTN4          | 9.50E-04 | 4.37E-02 | 0.18 | 1.2(1.08-1.33)  |
| 225 | GFRA1          | 9.61E-04 | 4.37E-02 | 0.20 | 1.23(1.09-1.38) |
| 226 | SARS2          | 9.81E-04 | 4.37E-02 | 0.18 | 1.19(1.07-1.32) |
| 227 | COX7CP1        | 9.81E-04 | 4.37E-02 | 0.24 | 1.27(1.1-1.47)  |
| 228 | ENPP1          | 9.82E-04 | 4.37E-02 | 0.15 | 1.16(1.06-1.27) |
| 229 | CRISPLD2       | 9.83E-04 | 4.37E-02 | 0.09 | 1.1(1.04-1.16)  |
| 230 | CDC42          | 9.86E-04 | 4.37E-02 | 0.16 | 1.17(1.07-1.29) |
| 231 | ACTA2          | 9.89E-04 | 4.37E-02 | 0.09 | 1.1(1.04-1.16)  |

Abbreviations: pos positively associated, neg negatively associated, P P value, FDR false discovery rate, C Coefficient, HR Hazard Ratio, CI confidence interval.

**Supplementary Table S2.** The loadings of 341 genes in the first 2 components.

| Genes    | PC1    | PC2    | Genes          | PC1    | PC2    | Genes     | PC1    | PC2    |
|----------|--------|--------|----------------|--------|--------|-----------|--------|--------|
| AADAC    | 0.008  | -0.059 | GJB1           | 0.022  | -0.059 | PPP3CA    | -0.026 | 0.014  |
| ABCD2    | 0.000  | 0.002  | GLT8D2         | -0.089 | 0.020  | PRIM2     | 0.011  | -0.010 |
| ACOT13   | 0.010  | -0.052 | GMPR           | 0.037  | -0.091 | PRKG1     | -0.025 | 0.014  |
| ACTA2    | -0.137 | -0.049 | GMPR2          | 0.005  | -0.010 | PRPS2     | 0.010  | -0.062 |
| ACTN4    | -0.016 | 0.014  | GNAI1          | -0.015 | 0.070  | PRRX1     | -0.092 | -0.019 |
| ACTR1A   | -0.019 | 0.005  | GNB1           | -0.011 | 0.013  | PSMC4     | -0.006 | 0.007  |
| ADH1B    | -0.108 | -0.016 | GPC1           | -0.027 | 0.073  | PSME2P2   | 0.011  | -0.107 |
| ADRA2A   | -0.060 | 0.042  | GPR124         | -0.048 | 0.032  | PTH1R     | -0.005 | 0.026  |
| AEBP1    | -0.149 | -0.012 | GPRC5C         | 0.012  | -0.032 | PTPN1     | -0.010 | 0.002  |
| AHDC1    | 0.001  | 0.058  | GSTZ1          | 0.014  | -0.045 | PTPRD     | -0.038 | 0.023  |
| AKAP12   | -0.056 | 0.076  | GUCY1A2        | -0.016 | 0.024  | PTRF      | -0.082 | 0.032  |
| AKR7A2   | 0.000  | 0.009  | GZMB           | -0.012 | -0.124 | RAB11FIP5 | -0.016 | 0.027  |
| ALDH5A1  | 0.035  | -0.037 | HIGD1B         | -0.008 | 0.004  | RAI14     | -0.048 | 0.030  |
| ANGPTL2  | -0.076 | 0.013  | HIPK1          | -0.058 | 0.007  | RARRES2   | -0.081 | 0.003  |
| ANTXR1   | -0.049 | 0.005  | HLA.DOB        | 0.013  | -0.084 | RBMS1P1   | -0.016 | 0.033  |
| AP3S1    | -0.018 | 0.000  | HP1BP3         | 0.000  | 0.012  | RCL1      | 0.010  | -0.023 |
| APBB2    | -0.036 | 0.043  | HSD17B6        | -0.055 | -0.012 | RCN3      | -0.071 | 0.005  |
| APH1B    | 0.005  | 0.005  | HSPB2.C11orf52 | -0.017 | 0.033  | RECK      | -0.063 | 0.015  |
| APOD     | -0.045 | 0.038  | HSPB6          | -0.004 | 0.059  | RGS16     | -0.066 | -0.020 |
| APPL2    | -0.005 | 0.052  | HSPB7          | -0.015 | 0.017  | RHOB      | -0.042 | 0.042  |
| ARHGAP19 | 0.002  | 0.018  | HTRA1          | -0.083 | 0.015  | RHOBTB3   | -0.075 | 0.103  |
| ARNT     | -0.002 | 0.028  | ID3            | -0.074 | 0.027  | RHOT1     | -0.004 | 0.028  |
| ASAP3    | -0.014 | 0.048  | IGF2           | -0.094 | 0.387  | RIN2      | -0.033 | 0.011  |
| ASPN     | -0.167 | -0.080 | IGFBP4         | -0.086 | 0.039  | RMI1      | 0.018  | -0.058 |
| AXL      | -0.047 | 0.012  | IL6R           | 0.018  | -0.098 | RNASEL    | -0.010 | 0.004  |
| BCAP31   | 0.006  | -0.057 | INHBA          | -0.178 | -0.110 | RPL21P75  | -0.001 | 0.011  |
| BCHE     | -0.064 | 0.005  | ITGA5          | -0.055 | -0.025 | RPS16     | 0.001  | 0.013  |
| BLMH     | -0.013 | 0.039  | ITPKC          | 0.001  | 0.024  | RPS23P8   | 0.000  | 0.026  |
| BRCC3    | 0.016  | -0.068 | ITSN1          | -0.016 | 0.042  | RPS6KA2   | -0.008 | 0.026  |
| C1QTNF3  | -0.083 | 0.001  | JAM2           | -0.048 | 0.027  | SACS      | -0.018 | 0.024  |
| C6orf165 | 0.007  | -0.002 | KIAA0020       | 0.008  | -0.046 | SARS2     | 0.002  | 0.049  |
| C9orf116 | 0.019  | -0.005 | KIAA0355       | -0.016 | 0.037  | SASH1     | -0.019 | 0.027  |
| CAAP1    | 0.014  | -0.043 | KIAA1462       | -0.030 | 0.040  | SDF2L1    | -0.001 | -0.065 |
| CALCOCO1 | -0.006 | 0.033  | KIF26B         | -0.048 | 0.006  | SDHAP3    | 0.011  | -0.021 |
| CASP8AP2 | 0.006  | -0.013 | KPNA3          | -0.015 | 0.013  | SDR39U1   | 0.009  | 0.006  |
| CCL13    | 0.000  | -0.027 | KRT18P38       | 0.004  | -0.002 | SEMA4F    | 0.002  | 0.034  |
| CD302    | -0.052 | -0.001 | LBP            | -0.001 | 0.008  | SENP6     | -0.001 | 0.002  |

|          |        |        |                 |        |        |          |        |        |
|----------|--------|--------|-----------------|--------|--------|----------|--------|--------|
| CD38     | 0.003  | -0.099 | LEFTY2          | -0.005 | 0.058  | SERTAD3  | -0.010 | 0.025  |
| CDC42    | -0.012 | -0.015 | LHFP            | -0.100 | 0.001  | SFXN3    | -0.035 | 0.004  |
| CHAF1B   | 0.012  | -0.030 | LINC00338       | 0.017  | -0.012 | SH3PXD2A | -0.029 | 0.017  |
| CIB1     | 0.013  | -0.069 | LMCD1           | -0.036 | -0.014 | SIRT5    | 0.015  | -0.038 |
| CILP     | -0.095 | -0.001 | LMOD1           | -0.056 | 0.024  | SLC25A1  | 0.003  | -0.040 |
| CLIC3    | -0.050 | 0.031  | LPAR2           | 0.014  | 0.009  | SLC27A2  | 0.013  | -0.025 |
| CLIP3    | -0.025 | 0.089  | LRIF1           | 0.007  | -0.009 | SLC37A4  | 0.017  | -0.006 |
| CNOT4    | 0.007  | -0.023 | LRIG1           | 0.018  | -0.011 | SLC5A1   | 0.023  | -0.085 |
| COA4     | 0.015  | -0.058 | LRP1            | -0.038 | 0.037  | SLC7A11  | 0.019  | -0.070 |
| COL10A1  | -0.153 | -0.076 | LRRC15          | -0.130 | -0.068 | SLIT3    | -0.023 | 0.073  |
| COL11A1  | -0.237 | -0.152 | LRRC17          | -0.075 | 0.067  | SNAI2    | -0.133 | -0.034 |
| COL16A1  | -0.088 | 0.014  | LRRK1           | 0.002  | -0.020 | SNORA21  | -0.002 | 0.039  |
| COL5A1   | -0.169 | -0.038 | LRRN3           | -0.008 | 0.023  | SNORA31  | -0.009 | 0.013  |
| COL8A1   | -0.101 | -0.029 | LTBP1           | -0.028 | 0.060  | SNRPA1   | 0.014  | -0.056 |
| COMP     | -0.132 | -0.028 | LUZP1           | -0.013 | 0.022  | SORBS1   | -0.028 | 0.015  |
| COPZ2    | -0.072 | -0.013 | LYPD3           | 0.004  | 0.027  | SPARC    | -0.100 | -0.025 |
| COX7A2P2 | 0.011  | -0.038 | MAGEF1          | 0.007  | 0.001  | SPDEF    | 0.041  | -0.033 |
| COX7C    | 0.005  | 0.013  | MAGEL2          | -0.012 | 0.051  | SRPX2    | -0.074 | -0.011 |
| COX7CP1  | 0.005  | 0.011  | MAK             | 0.024  | 0.004  | ST6GAL1  | 0.010  | -0.056 |
| CPEB1    | -0.004 | 0.036  | MAL             | -0.026 | 0.081  | STK39    | -0.016 | 0.007  |
| CPQ      | -0.031 | 0.005  | MAN2A1          | -0.030 | -0.045 | STOML2   | 0.016  | -0.041 |
| CREB3    | -0.001 | -0.037 | MCAT            | 0.011  | -0.025 | STXBP6   | 0.032  | -0.123 |
| CRISPLD2 | -0.145 | -0.049 | MCM3            | 0.017  | -0.016 | SUGCT    | -0.070 | -0.018 |
| CRY2     | -0.004 | 0.017  | MCM5            | 0.008  | -0.059 | SUPT5H   | -0.006 | 0.025  |
| CRYAB    | -0.054 | -0.017 | MFAP4           | -0.067 | 0.103  | SURF2    | 0.011  | -0.017 |
| CXCL11   | -0.008 | -0.277 | MFAP5           | -0.122 | 0.009  | SV2A     | -0.005 | 0.068  |
| CXCL14   | -0.151 | -0.028 | MINOS1.NB<br>L1 | -0.093 | -0.018 | SVEP1    | -0.065 | -0.011 |
| CYB561   | 0.012  | -0.022 | MOXD1           | -0.065 | -0.027 | SVIL     | -0.041 | 0.045  |
| CYBA     | 0.007  | -0.106 | MPRIP           | -0.022 | 0.050  | SYDE1    | -0.018 | 0.035  |
| CYBRD1   | -0.023 | 0.016  | MPZ             | 0.002  | 0.019  | SYK      | 0.018  | -0.040 |
| CYTH3    | -0.010 | 0.019  | MRPS11          | 0.009  | -0.045 | SYNGR2   | 0.002  | -0.085 |
| DACT1    | -0.076 | 0.020  | MUL1            | 0.002  | 0.003  | TAP1     | 0.006  | -0.216 |
| DCHS1    | -0.070 | 0.073  | MXRA8           | -0.077 | 0.071  | TAP2     | 0.005  | -0.134 |
| DCN      | -0.143 | -0.036 | MYL9            | -0.066 | 0.022  | TBCC     | 0.011  | -0.011 |
| DHRS4    | 0.012  | -0.018 | N4BP2L2         | -0.004 | 0.015  | TDP2     | 0.005  | -0.045 |
| DKK2     | -0.047 | 0.006  | NAT10           | 0.017  | -0.014 | TESK1    | 0.001  | -0.022 |
| DNAJA1   | 0.006  | -0.066 | NDRG3           | 0.001  | 0.027  | TGFB1I1  | -0.111 | -0.005 |
| ECM2     | -0.099 | 0.003  | NET1            | -0.029 | -0.010 | THBS2    | -0.188 | -0.137 |
| EDNRA    | -0.093 | -0.020 | NFX1            | 0.009  | -0.023 | THOP1    | 0.007  | -0.016 |

|          |        |        |          |        |        |                    |        |        |
|----------|--------|--------|----------|--------|--------|--------------------|--------|--------|
| EFHC2    | 0.038  | -0.003 | NPY      | 0.000  | 0.072  | TIMP3              | -0.133 | 0.017  |
| EFTUD1   | 0.007  | -0.027 | NR2F1    | -0.049 | 0.123  | TIPIN              | 0.014  | -0.044 |
| EHD2     | -0.044 | 0.018  | NT5C     | 0.008  | -0.011 | TMEM158            | -0.121 | -0.074 |
| EMC9     | 0.009  | -0.029 | NUAK1    | -0.111 | -0.004 | TMEM204            | -0.042 | 0.009  |
| EMCN     | -0.029 | 0.001  | OLFML1   | -0.074 | 0.011  | TMEM222            | 0.004  | 0.006  |
| EMILIN1  | -0.066 | 0.015  | OMD      | -0.068 | -0.013 | TMEM256.<br>PLSCR3 | -0.025 | 0.039  |
| ENDOG    | 0.013  | -0.042 | OSR2     | -0.060 | 0.043  | TMEM45A            | -0.087 | 0.080  |
| ENOX1    | -0.030 | 0.016  | OXLD1    | 0.015  | -0.049 | TMEM47             | -0.069 | 0.053  |
| ENPP1    | -0.058 | 0.008  | PADI2    | -0.005 | -0.006 | TNFAIP6            | -0.092 | -0.106 |
| ERCC8    | -0.005 | 0.027  | PAK4     | 0.004  | 0.045  | TPT1               | -0.009 | 0.012  |
| ESD      | -0.012 | 0.026  | PALLD    | -0.098 | 0.005  | TRIL               | -0.032 | 0.053  |
| EYA4     | -0.016 | 0.124  | PCBP3    | 0.001  | 0.009  | TRIM26             | 0.010  | -0.037 |
| FAH      | 0.002  | -0.041 | PCDH9    | -0.010 | 0.058  | TRIM27             | 0.014  | -0.012 |
| FAM114A1 | -0.038 | -0.004 | PCK2     | 0.009  | -0.070 | TUBB2A             | -0.073 | 0.020  |
| FAM86B2  | 0.011  | -0.005 | PCOLCE   | -0.100 | 0.023  | TUBB6              | -0.074 | 0.002  |
| FAP      | -0.151 | -0.102 | PDE2A    | -0.012 | 0.023  | UBD                | -0.004 | -0.282 |
| FBN1     | -0.156 | -0.043 | PDGFD    | -0.081 | 0.037  | UBL3               | -0.018 | 0.026  |
| FBXO17   | -0.002 | 0.087  | PDGFRA   | -0.126 | 0.020  | VAT1               | -0.026 | 0.030  |
| FCHSD2   | 0.003  | -0.031 | PDGFRB   | -0.061 | 0.013  | VCP                | 0.000  | -0.047 |
| FEN1     | 0.012  | -0.055 | PDLIM2   | -0.054 | -0.007 | WARS               | -0.003 | -0.118 |
| FGF1     | -0.033 | -0.002 | PDLIM3   | -0.114 | -0.050 | WASF2              | -0.004 | 0.019  |
| FLNC     | -0.019 | 0.047  | PDP1     | -0.012 | -0.030 | WBP1L              | -0.032 | -0.008 |
| FMO2     | -0.039 | -0.035 | PDPN     | -0.087 | 0.018  | WDR3               | 0.024  | -0.014 |
| FN3KRP   | 0.005  | -0.023 | PER1     | -0.007 | 0.016  | WDR45B             | 0.007  | -0.057 |
| FOCAD    | 0.007  | -0.019 | PINK1    | -0.006 | 0.011  | WDR77              | 0.023  | -0.010 |
| FOXJ1    | 0.040  | 0.003  | PIR      | 0.026  | -0.103 | XYLT1              | -0.057 | -0.002 |
| FOXN3    | -0.020 | 0.019  | PKD2     | -0.048 | 0.005  | YWHAB              | -0.008 | 0.009  |
| FRYL     | -0.002 | -0.032 | PLAA     | 0.005  | -0.047 | ZBTB40             | 0.001  | 0.036  |
| FSTL3    | -0.024 | 0.015  | PLEKHA1  | -0.009 | 0.046  | ZCCHC24            | -0.073 | 0.018  |
| FXYS5    | -0.035 | -0.005 | PLOD3    | -0.012 | -0.002 | ZEB1               | -0.102 | 0.009  |
| FZD1     | -0.073 | -0.004 | PLXDC1   | -0.056 | -0.006 | ZFHX4              | -0.044 | 0.024  |
| GALNT10  | -0.054 | -0.007 | POLA2    | 0.013  | -0.036 | ZFP36              | -0.045 | -0.013 |
| GALNT12  | 0.021  | -0.029 | POLD3    | 0.015  | -0.025 | ZNF165             | 0.015  | -0.033 |
| GALNT6   | 0.018  | -0.066 | POLG     | 0.008  | -0.025 | ZNF365             | -0.012 | 0.014  |
| GCH1     | -0.009 | -0.123 | PPAP2A   | -0.054 | -0.004 | ZNF440             | 0.010  | 0.005  |
| GCNT1    | -0.001 | -0.025 | PPEF1    | -0.024 | -0.009 | ZNF780B            | 0.002  | 0.019  |
| GFPT2    | -0.068 | -0.015 | PPP1R13L | -0.017 | 0.030  | ZNHIT2             | 0.015  | -0.019 |
| GFRA1    | -0.009 | 0.013  | PPP1R3C  | -0.036 | 0.036  |                    |        |        |

**Supplementary Table S3.** The coefficients of first 2 component in principal component analysis.

| PC  | Coef     | SE      | Z     | P        | HR      |
|-----|----------|---------|-------|----------|---------|
| PC1 | -0.02862 | 0.00464 | -6.17 | 7.00E-10 | 0.97178 |
| PC2 | 0.06856  | 0.00964 | 7.11  | 1.10E-12 | 1.07097 |

**Supplementary Table S4.** List of 155 OS-associated genes with FDR<0.05 in the Riester et al. study.

| Genes     | FDR      | Genes     | FDR      | Genes   | FDR      | Genes    | FDR      |
|-----------|----------|-----------|----------|---------|----------|----------|----------|
| GMPR      | 2.56E-04 | TESK1     | 2.33E-02 | LTA4H   | 2.99E-02 | KIF20B   | 4.19E-02 |
| MFAP4     | 7.61E-04 | MATN3     | 2.36E-02 | BMI1    | 2.99E-02 | TMEM134  | 4.19E-02 |
| LRRC17    | 7.61E-04 | ITGB7     | 2.42E-02 | RB1     | 3.05E-02 | PDGFRA   | 4.19E-02 |
| GJB1      | 2.24E-03 | ISG20     | 2.45E-02 | PIR     | 3.05E-02 | WDR77    | 4.19E-02 |
| NUAK1     | 2.24E-03 | ADH1B     | 2.45E-02 | CHD1    | 3.05E-02 | SAT1     | 4.19E-02 |
| LEFTY2    | 2.24E-03 | HLA.DOB   | 2.45E-02 | PDE1A   | 3.15E-02 | ARID5B   | 4.20E-02 |
| DDB2      | 2.24E-03 | EXTL2     | 2.45E-02 | APBB2   | 3.15E-02 | NT5C     | 4.23E-02 |
| EDNRA     | 2.29E-03 | COL16A1   | 2.49E-02 | GSTZ1   | 3.19E-02 | TAP1     | 4.23E-02 |
| HSD17B6   | 3.98E-03 | URI1      | 2.49E-02 | COL8A1  | 3.28E-02 | PDGFRB   | 4.23E-02 |
| ZCCHC24   | 4.20E-03 | SLC20A2   | 2.49E-02 | AQP5    | 3.28E-02 | ITPKC    | 4.24E-02 |
| AP3S1     | 5.90E-03 | JMJD1C    | 2.49E-02 | RASA1   | 3.28E-02 | CLDN10   | 4.33E-02 |
| FOXJ1     | 9.64E-03 | FERMT2    | 2.49E-02 | SEMA4F  | 3.28E-02 | P4HA2    | 4.33E-02 |
| RECK      | 9.74E-03 | KCNV1     | 2.49E-02 | NCOA3   | 3.37E-02 | SPOCK1   | 4.33E-02 |
| PI3       | 1.26E-02 | NFS1      | 2.49E-02 | CUX1    | 3.37E-02 | MARK4    | 4.33E-02 |
| RAB11FIP5 | 1.26E-02 | PDGFD     | 2.49E-02 | RECQL   | 3.41E-02 | HOXA5    | 4.33E-02 |
| WDR45L    | 1.37E-02 | GALNT10   | 2.49E-02 | SNAI2   | 3.75E-02 | SYDE1    | 4.54E-02 |
| SVIL      | 1.37E-02 | AVP11     | 2.49E-02 | RARB    | 3.75E-02 | NR1H3    | 4.54E-02 |
| GULP1     | 1.37E-02 | DCN       | 2.49E-02 | CD38    | 3.75E-02 | CDC23    | 4.54E-02 |
| APC       | 1.37E-02 | GPC1      | 2.49E-02 | COL11A1 | 3.83E-02 | C6orf108 | 4.54E-02 |
| STK39     | 1.40E-02 | FSTL1     | 2.49E-02 | BCHE    | 3.86E-02 | APPL2    | 4.54E-02 |
| XRCC4     | 1.44E-02 | N4BP2L2   | 2.49E-02 | DSE     | 3.86E-02 | RIN2     | 4.57E-02 |
| CSNK1G3   | 1.44E-02 | NINJ1     | 2.63E-02 | PDS5B   | 3.86E-02 | HSD3B2   | 4.57E-02 |
| CD302     | 1.65E-02 | CTNBL1    | 2.63E-02 | SYT11   | 3.86E-02 | PAF1     | 4.60E-02 |
| ALDH1A2   | 1.66E-02 | RHOT1     | 2.63E-02 | SNTB2   | 3.86E-02 | UCP2     | 4.64E-02 |
| ECM2      | 1.68E-02 | APOD      | 2.63E-02 | TNFAIP6 | 3.90E-02 | RPS6KA2  | 4.64E-02 |
| AKAP12    | 1.82E-02 | ST6GAL1   | 2.63E-02 | LMO7    | 4.04E-02 | CETN2    | 4.75E-02 |
| PDPN      | 1.82E-02 | HIST1H2BJ | 2.64E-02 | TUFT1   | 4.10E-02 | LMOD1    | 4.76E-02 |
| ZEB1      | 1.82E-02 | SPDEF     | 2.76E-02 | GRHR    | 4.12E-02 | LTBP1    | 4.76E-02 |
| SIRT5     | 1.82E-02 | CILP      | 2.76E-02 | CCDC41  | 4.12E-02 | UTP14C   | 4.76E-02 |
| EYA4      | 1.97E-02 | IGFBP6    | 2.76E-02 | COL5A2  | 4.12E-02 | GSTP1    | 4.76E-02 |
| SPATA2    | 1.97E-02 | PSMC4     | 2.76E-02 | CNN1    | 4.12E-02 | TJP1     | 4.76E-02 |
| DUS1L     | 2.06E-02 | FBL       | 2.76E-02 | GFPT2   | 4.12E-02 | ITSN1    | 4.76E-02 |
| SLC7A11   | 2.09E-02 | PALLD     | 2.76E-02 | HLA.DOA | 4.12E-02 | PSMB8    | 4.84E-02 |
| KIAA0564  | 2.19E-02 | TIMP3     | 2.76E-02 | PTPRCAP | 4.12E-02 | PSMD8    | 4.86E-02 |
| ADARB1    | 2.19E-02 | PTPN1     | 2.76E-02 | GGNBP2  | 4.12E-02 | IL2RG    | 4.87E-02 |
| LGALS3BP  | 2.19E-02 | KRT23     | 2.77E-02 | MAN1B1  | 4.12E-02 | COMP     | 4.89E-02 |
| GZMB      | 2.19E-02 | ALDH5A1   | 2.78E-02 | SAMD4A  | 4.12E-02 | ADNP     | 4.89E-02 |
| CXCL14    | 2.32E-02 | CXCL11    | 2.90E-02 | TRIL    | 4.12E-02 | NKG7     | 4.99E-02 |
| PJA2      | 2.33E-02 | FXYD1     | 2.96E-02 | PACSIN3 | 4.19E-02 |          |          |

**Supplementary Table S5.** List of 31 OS-associated genes with FDR<0.05 in the Willis et al. study.

| Genes     | FDR      | Genes  | FDR      | Genes   | FDR      | Genes   | FDR      |
|-----------|----------|--------|----------|---------|----------|---------|----------|
| AXL       | 2.20E-02 | CYBRD1 | 4.10E-02 | PAXIP1  | 4.10E-02 | ASAP3   | 4.80E-02 |
| LRIG1     | 2.20E-02 | PINK1  | 4.10E-02 | CYB561  | 4.10E-02 | FAM174B | 4.80E-02 |
| APC       | 2.90E-02 | LRRN3  | 4.10E-02 | POLA2   | 4.10E-02 | AGR2    | 4.80E-02 |
| SLC33A1   | 3.00E-02 | AQP1   | 4.10E-02 | CDH1    | 4.10E-02 | SDR39U1 | 4.80E-02 |
| NUCB2     | 3.00E-02 | DES    | 4.10E-02 | GMNN    | 4.10E-02 | MAGT1   | 4.80E-02 |
| POLD3     | 3.00E-02 | ESR2   | 4.10E-02 | SLC37A4 | 4.10E-02 | GJB1    | 4.90E-02 |
| RAB11FIP5 | 4.10E-02 | GOLPH3 | 4.10E-02 | XRCC4   | 4.70E-02 | SDF2L1  | 5.00E-02 |
| C19orf2   | 4.10E-02 | XBP1   | 4.10E-02 | BCHE    | 4.80E-02 |         |          |



**Supplementary Table S6.** Univariate cox regression analysis of BCHE, GJB1 and RAB11FIP5 in EB dataset and TCGA RNA-Seq dataset.

| Variable                                  | C       | P              | HR    |
|-------------------------------------------|---------|----------------|-------|
| <b>Training in EB dataset</b>             |         |                |       |
| BCHE                                      | 0.1225  | <b>0.00079</b> | 1.13  |
| GJB1                                      | -0.2598 | <b>4.0E-06</b> | 0.77  |
| RAB11FIP5                                 | 0.4037  | <b>2.9E-06</b> | 1.50  |
| Combination                               | 2.325   | <b>3.6E-11</b> | 10.22 |
| <b>Validation in TCGA RNA-Seq dataset</b> |         |                |       |
| BCHE                                      | 0.0702  | 0.054          | 1.07  |
| GJB1                                      | -0.0943 | <b>0.026</b>   | 0.91  |
| RAB11FIP5                                 | 0.237   | 0.053          | 1.27  |
| Combination                               | 1.000   | <b>0.0029</b>  | 2.72  |

Abbreviations: C Coefficient, P P value, HR Hazard Ratio.

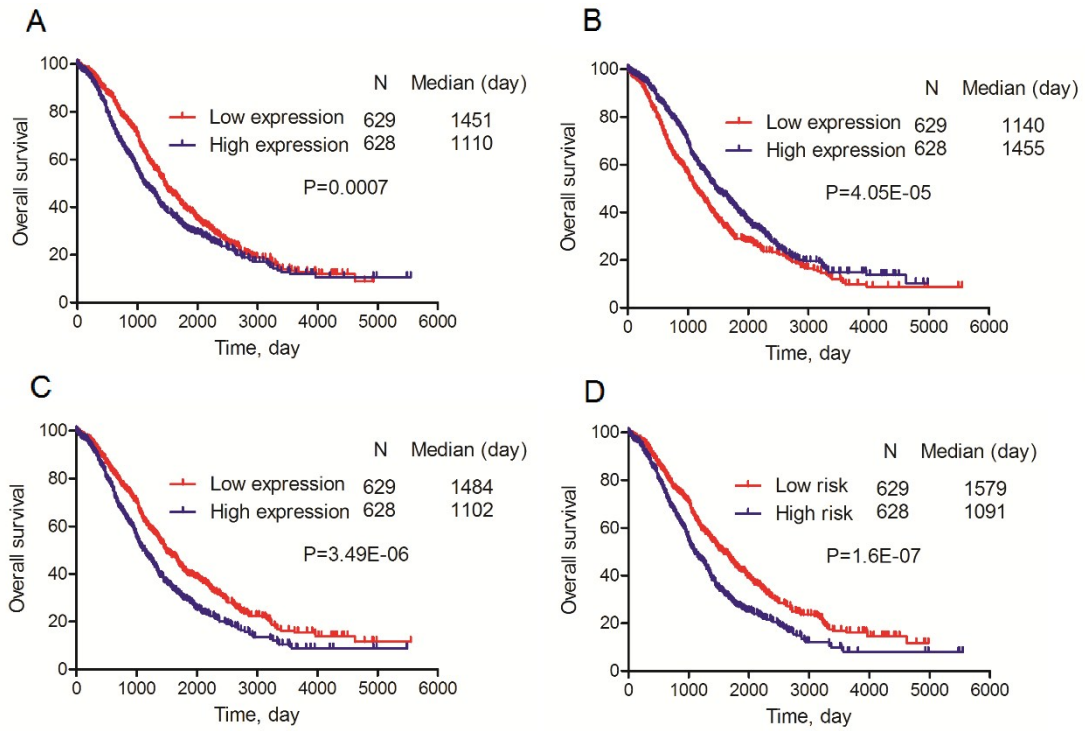

**Supplementary Figure 1.** K-M curve of 3 genes in this study which were significantly associated with overall survival in all three studies. (A) BCHE. (B) GJB1. (C) RAB11FIP5. (D) Combination of 3 genes.

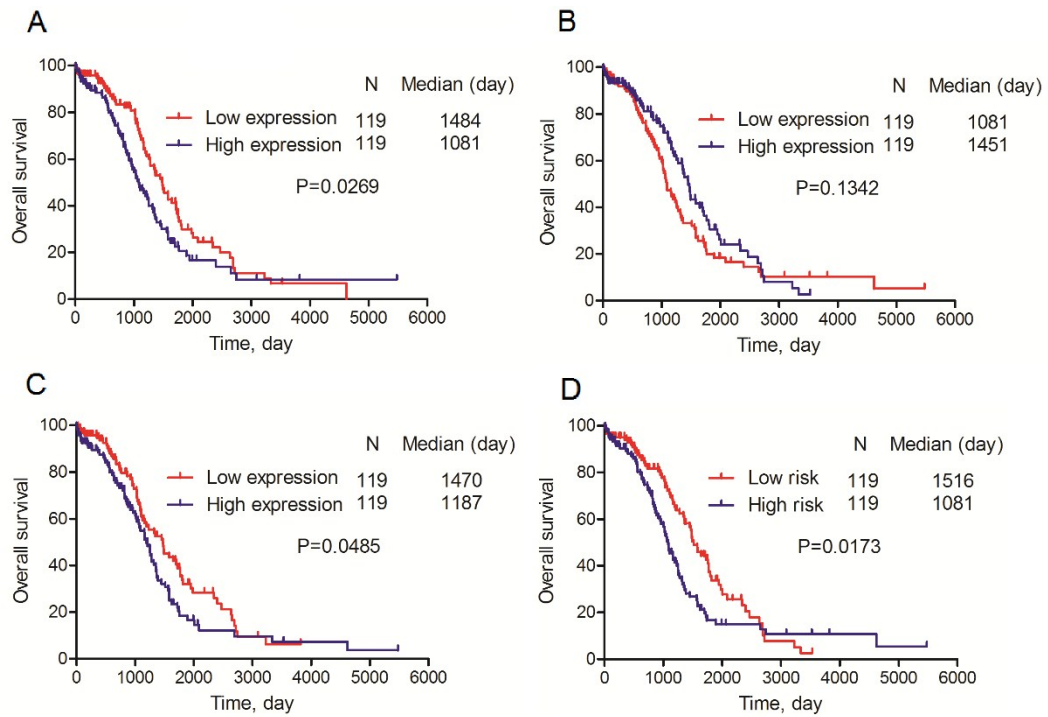

**Supplementary Figure 2.** K-M curve of 3 genes in TCGA RNA-Seq data which were significantly associated with overall survival in all three studies. (A) BCHE. (B) GJB1. (C) RAB11FIP5. (D) Combination of 3 genes.
